# Supplementary material for: Self-assembled tetrazine cryptophane for ion pair recognition and guest release by cage disassembly
Source: Royal Society of Chemistry journal article supplement (doi:10.1039/d4cc01421a), 2024-01-01
Supplement: d4cc01421a1.pdf [file d4cc01421a1.pdf]

# Self-Assembled Tetrazine Cryptophane for Ion Pairs Recognition and Guest Release by Cage Disassembly

Louise Miton,<sup>a</sup> Elise Antonetti,<sup>a</sup> Marie Poujade,<sup>a</sup> Jean-Pierre Dutasta,<sup>b</sup> Paola Nava,<sup>a</sup> Alexandre Martinez,<sup>\*a</sup> Yoann Cotelte<sup>\*a</sup>

<sup>a</sup> Aix Marseille Université, CNRS, Centrale Marseille, iSm2, UMR 7313 Campus Scientifique de St Jérôme, 13397 Marseille, France

<sup>b</sup> ENS Lyon, CNRS, Laboratoire de Chimie, UMR 5182, 46 Allée d'Italie, 69364 Lyon, France

## Supplementary information

### Table of content

|                                                |    |
|------------------------------------------------|----|
| 1. Materials and Methods .....                 | 2  |
| 2. Synthesis .....                             | 3  |
| 3. Titration experiments.....                  | 4  |
| 4. Single Crystal X-Ray Diffraction Data ..... | 5  |
| 5. DFT Calculations .....                      | 14 |
| 6. Supplementary Figures.....                  | 28 |
| 7. NMR spectra of compound 3 .....             | 31 |
| 8. References .....                            | 32 |

## 1. Materials and Methods

Starting material and solvents were of commercial grade and were used without further purification. Column chromatography was carried out with Merck 60 A (0.040–0.063 mm) silica gel. TLC was performed with Merck silica gel 60 F254 plates. <sup>1</sup>H and <sup>13</sup>C NMR spectra were recorded on Bruker Avance III HD 300 MHz, 400 MHz and 500 MHz spectrometers. Chemical shifts are reported in ppm on the  $\delta$  scale relative to residual solvent as the internal references. Coupling constants (*J*) are reported in hertz (Hz). Multiplicities are described with the following standard abbreviations: s =

singlet, d = doublet, t = triplet, m = multiplet. High-resolution mass spectra (HRMS) were performed on a SYNAPT G2 HDMS (Waters) mass spectrometer equipped with atmospheric pressure ionization source (API) pneumatically assisted. Spectra were obtained with TOF analysis. Measurements were realized with two internal standards. Infrared spectra were recorded on a Bruker TENSOR 27 Fourier Transform infrared spectrometer equipped with a single reflection diamond Attenuated Total Reflexion accessory (Bruker A222).

## 2. Synthesis

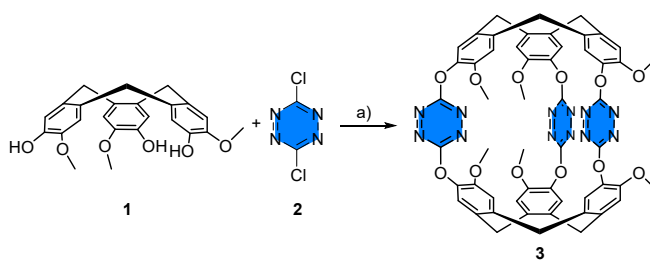

**Scheme S1.** Synthesis of cryptophane **3**. a) conditions:  $\text{Et}_3\text{N}$ , acetonitrile,  $25^\circ\text{C}$ , 3.5h, 15%.

**CTV (-OMe, -OH) 1.** This compound was prepared following the literature procedure.<sup>1</sup>

### Cryptophane 3.

Under inert condition, CTV (-OMe, -OH) **1** (50 mg, 0.12 mmol) and 3,6-dichlorotetrazine **2** (27 mg, 0.18 mmol) were dissolved in anhydrous acetonitrile (27 mL). 10 minutes later, triethylamine (56 mg, 0.55 mmol) was added and the resulting mixture was stirred at room temperature for 3.5 hours. Saturated aqueous  $\text{NH}_4\text{Cl}$  solution (5 mL) was added to quench the reaction. Aqueous layer was extracted with  $\text{CH}_2\text{Cl}_2$  (2 x 10 mL) and the combined organic layers were dried over  $\text{MgSO}_4$  and evaporated under reduce pressure. The crude product was then purified by silica gel column chromatography using  $\text{CH}_2\text{Cl}_2$  100 % and then  $\text{CH}_2\text{Cl}_2/\text{acetone}$ : 90/10 as eluant, to afford **3** as a pink solid (20 mg, 15%).  $R_f$  ( $\text{SiO}_2$ ,  $\text{CH}_2\text{Cl}_2/\text{acetone}$ : 97/3): 0.35. **Mp**:  $> 250^\circ\text{C}$ ; **IR** (neat): 2925 (w) C-H vibrations in methoxy functional group, 1665 (w) C=N vibrations, 1510 (m), 1465 (w), 1405 (m), 1385 (s), 1327 (w), 1278 (m), 1207 (w), 1083 (w), 1013 (w).  **$^1\text{H NMR}$**  (400 MHz,  $\text{CDCl}_3$ ): 7.07 (s, 6H), 6.80 (s, 6H), 4.77 (d,  $^2J = 13.8$  Hz, 6H), 3.61 (d,  $^2J = 13.8$  Hz, 6H), 3.60 (s, 18H).  **$^{13}\text{C NMR}$**  (100 MHz,  $\text{CDCl}_3$ ): 166.4, 149.7, 139.9, 138.1, 131.5,

122.7, 114.3, 56.2, 36.4. **ESI-MS:**  $[M+NH_4]^+$  1068.3 and  $[M+CH_3COO]^-$  1109.3. **HRMS** (ESI-TOF)  $m/z$  calc for  $C_{54}H_{42}N_{12}O_{12}Na$   $(M+Na)^+$  1073.2937, found 1073.2938.

### 3. Titration experiments

A solution of host **3** (1 mM or 0.79 mM in  $CD_3CN$ , 600  $\mu$ L) was titrated in NMR tubes with aliquots of a concentrated solution (24 mM or 19 mM in the same solvent) of guests. For the fast exchange compared to the NMR time scale: The shifts  $\delta$  of the host's protons signals were measured after each addition and plotted as a function of the guest/host ratio ( $[G]/[H]$ ). Association constant  $K_a$  was obtained by nonlinear least-squares fitting of these plots using bindfit program from Thordarson's group.<sup>2,3</sup> For the slow exchange compared to the NMR time scale: Using the 1:1 equilibrium of host-guest complexation, association constant  $K_a$  was determined with the following equations:<sup>4</sup>

$$K_a = \frac{[C]}{([H]_t - [C]) \cdot ([G]_t - [C])}$$

$$[C] = \frac{n}{m+n} \cdot [H]_t$$

Where  $C$  is complex;  $H$ , host and  $G$ , guest. The ratio of  $n/(m+n)$  is obtained from the NMR spectral data.

## 4. Single Crystal X-Ray Diffraction Data

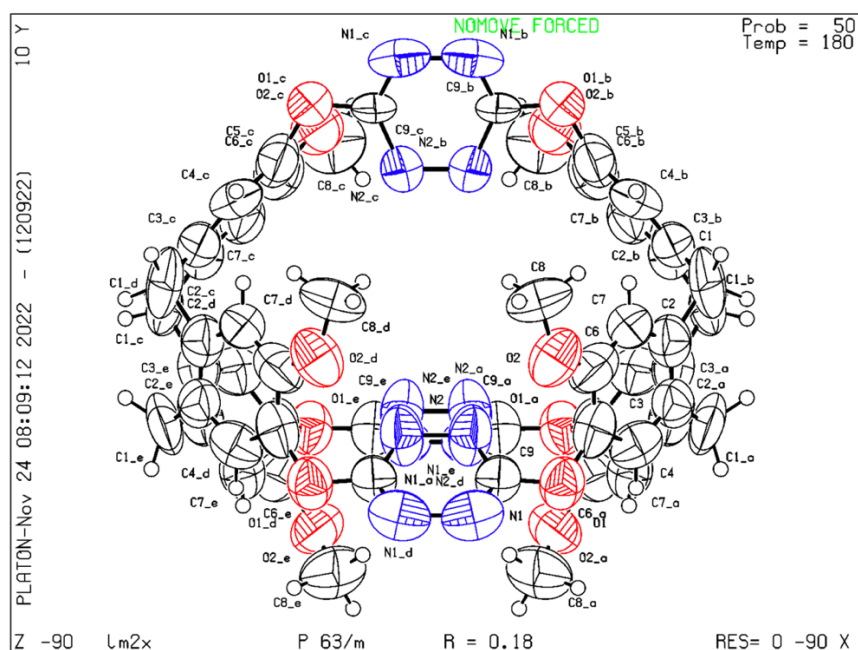

**Figure S1.** Thermal ellipsoid plot of **3** with the anisotropic displacement parameters drawn at the 50% probability level.

Single crystals of  $C_{54}H_{42}N_{12}O_{12}$  were crystallized by slow evaporation of acetonitrile at 4°C from a solution of compound **3**. A suitable crystal was selected and mounted on a SuperNova, Dual, Cu at home/near, AtlasS2 diffractometer. The crystal was kept at 180.00(10) K during data collection. Using Olex2,<sup>5</sup> the structure was solved with the SHELXT<sup>6</sup> structure solution program using Intrinsic Phasing and refined with the SHELX refinement package using Least Squares minimization. The resolution is very average, as the crystals are full of solvent and degrade very quickly. The solvent is not represented in the structure, as it is too disordered to be identified.

**Table S1.** Crystal data and structure refinement for cryptophane **3**.

|                            |                            |
|----------------------------|----------------------------|
| <b>Identification code</b> | lm2x                       |
| <b>Empirical formula</b>   | $C_{54}H_{42}N_{12}O_{12}$ |
| <b>Formula weight</b>      | 1051                       |

|                                             |                                                               |
|---------------------------------------------|---------------------------------------------------------------|
| Temperature/K                               | 180.00(10)                                                    |
| Crystal system                              | hexagonal                                                     |
| Space group                                 | P6 <sub>3</sub> /m                                            |
| a/Å                                         | 14.165(2)                                                     |
| b/Å                                         | 14.165(2)                                                     |
| c/Å                                         | 20.997(3)                                                     |
| α/°                                         | 90                                                            |
| β/°                                         | 90                                                            |
| γ/°                                         | 120                                                           |
| Volume/Å <sup>3</sup>                       | 3648.3(13)                                                    |
| Z                                           | 12                                                            |
| ρ <sub>calc</sub> /cm <sup>3</sup>          | 0.957                                                         |
| μ/mm <sup>-1</sup>                          | 0.581                                                         |
| F(000)                                      | 1092.0                                                        |
| Crystal size/mm <sup>3</sup>                | 0.24 × 0.08 × 0.06                                            |
| Radiation                                   | Cu Kα (λ = 1.54184)                                           |
| 2θ range for data collection/°              | 8.348 to 151.546                                              |
| Index ranges                                | -16 ≤ h ≤ 16, -17 ≤ k ≤ 12, -25 ≤ l ≤ 22                      |
| Reflections collected                       | 8709                                                          |
| Independent reflections                     | 2521 [R <sub>int</sub> = 0.0481, R <sub>sigma</sub> = 0.0507] |
| Data/restraints/parameters                  | 2521/12/120                                                   |
| Goodness-of-fit on F <sup>2</sup>           | 1.016                                                         |
| Final R indexes [I >= 2σ (I)]               | R <sub>1</sub> = 0.1751, wR <sub>2</sub> = 0.2949             |
| Final R indexes [all data]                  | R <sub>1</sub> = 0.2209, wR <sub>2</sub> = 0.3118             |
| Largest diff. peak/hole / e Å <sup>-3</sup> | 0.33/-0.42                                                    |

**Table S2.** Fractional Atomic Coordinates (×10<sup>4</sup>) and Equivalent Isotropic Displacement Parameters (Å<sup>2</sup>×10<sup>3</sup>) for cryptophane **3**. U<sub>eq</sub> is defined as 1/3 of the trace of the

orthogonalised  $U_{ij}$  tensor.

| <b>Ato</b><br><b>m</b> | <b>x</b> | <b>y</b>  | <b>z</b> | <b>U(eq)</b> |
|------------------------|----------|-----------|----------|--------------|
| <b>O1</b>              | 3527(6)  | 10242(5)  | 3753(3)  | 109(2)       |
| <b>O2</b>              | 5630(6)  | 10580(6)  | 3683(3)  | 129(2)       |
| <b>N1</b>              | 3490(6)  | 10917(5)  | 2863(4)  | 122(3)       |
| <b>N2</b>              | 3624(8)  | 9303(6)   | 2839(3)  | 129(3)       |
| <b>C1</b>              | 4788(11) | 7604(9)   | 5198(4)  | 141(5)       |
| <b>C2</b>              | 4349(10) | 8261(9)   | 4823(5)  | 108(3)       |
| <b>C3</b>              | 3279(10) | 8054(9)   | 4857(4)  | 105(3)       |
| <b>C4</b>              | 3054(8)  | 8656(7)   | 4487(5)  | 106(3)       |
| <b>C5</b>              | 3838(10) | 9502(10)  | 4078(5)  | 120(3)       |
| <b>C6</b>              | 4891(10) | 9695(10)  | 4064(6)  | 124(4)       |
| <b>C7</b>              | 5108(9)  | 9073(10)  | 4427(5)  | 112(3)       |
| <b>C8</b>              | 6568(8)  | 10695(10) | 3527(6)  | 154(5)       |
| <b>C9</b>              | 3560(8)  | 10196(6)  | 3118(4)  | 94(3)        |

**Table S3.** Anisotropic Displacement Parameters ( $\text{\AA}^2 \times 10^3$ ) for cryptophane **3**. The Anisotropic displacement factor exponent takes the form:  $-2\pi^2[h^2a^*2U_{11}+2hka^*b^*U_{12}+\dots]$ .

| <b>Ato</b><br><b>m</b> | <b>U<sub>11</sub></b> | <b>U<sub>22</sub></b> | <b>U<sub>33</sub></b> | <b>U<sub>23</sub></b> | <b>U<sub>13</sub></b> | <b>U<sub>12</sub></b> |
|------------------------|-----------------------|-----------------------|-----------------------|-----------------------|-----------------------|-----------------------|
| <b>O1</b>              | 145(5)                | 99(4)                 | 92(4)                 | -2(3)                 | 5(4)                  | 67(4)                 |
| <b>O2</b>              | 132(6)                | 105(5)                | 126(5)                | 4(4)                  | 35(5)                 | 42(4)                 |
| <b>N1</b>              | 117(6)                | 68(4)                 | 177(9)                | -10(4)                | 7(5)                  | 43(4)                 |
| <b>N2</b>              | 205(9)                | 114(6)                | 84(5)                 | 10(4)                 | 16(5)                 | 92(6)                 |
| <b>C1</b>              | 213(13)               | 121(8)                | 63(5)                 | -27(6)                | -45(7)                | 64(8)                 |
| <b>C2</b>              | 132(8)                | 112(7)                | 84(6)                 | -9(5)                 | -8(5)                 | 63(6)                 |

|           |        |         |         |        |       |       |
|-----------|--------|---------|---------|--------|-------|-------|
| <b>C3</b> | 143(9) | 111(7)  | 82(6)   | -8(5)  | -7(6) | 80(7) |
| <b>C4</b> | 114(7) | 79(6)   | 128(8)  | -25(6) | 5(6)  | 50(6) |
| <b>C5</b> | 141(7) | 128(7)  | 84(6)   | -18(5) | 8(6)  | 62(6) |
| <b>C6</b> | 111(8) | 143(10) | 116(8)  | -8(7)  | 25(7) | 63(8) |
| <b>C7</b> | 127(7) | 140(8)  | 95(6)   | -13(5) | -7(5) | 88(6) |
| <b>C8</b> | 98(8)  | 179(12) | 200(13) | 2(10)  | 38(8) | 81(8) |
| <b>C9</b> | 149(8) | 66(5)   | 94(6)   | 1(4)   | 4(6)  | 75(5) |

**Table S4.** Bond lengths for cryptophane **3**.

| <b>Ato</b> | <b>Ato</b>      | <b>Length/Å</b> | <b>Ato</b> | <b>Ato</b>      | <b>Length/Å</b> |
|------------|-----------------|-----------------|------------|-----------------|-----------------|
| <b>m</b>   | <b>m</b>        |                 | <b>m</b>   | <b>m</b>        |                 |
| <b>O1</b>  | C5              | 1.490(13)       | C1         | C2              | 1.566(13)       |
| <b>O1</b>  | C9              | 1.336(9)        | C1         | C3 <sup>2</sup> | 1.433(13)       |
| <b>O2</b>  | C6              | 1.412(12)       | C2         | C3              | 1.393(14)       |
| <b>O2</b>  | C8              | 1.296(10)       | C2         | C7              | 1.391(13)       |
| <b>N1</b>  | N1 <sup>1</sup> | 1.526(16)       | C3         | C4              | 1.306(12)       |
| <b>N1</b>  | C9              | 1.201(9)        | C4         | C5              | 1.440(13)       |
| <b>N2</b>  | N2 <sup>1</sup> | 1.422(14)       | C5         | C6              | 1.376(14)       |
| <b>N2</b>  | C9              | 1.438(10)       | C6         | C7              | 1.312(14)       |

<sup>1</sup>+X,+Y,1/2-Z; <sup>2</sup>+Y-X,1-X,+Z

**Table S5.** Bond Angles for cryptophane **3**.

| <b>Ato</b> | <b>Ato</b> | <b>Ato</b> | <b>Angle/°</b> | <b>Ato</b> | <b>Ato</b> | <b>Ato</b> | <b>Angle/°</b> |
|------------|------------|------------|----------------|------------|------------|------------|----------------|
| <b>m</b>   | <b>m</b>   | <b>m</b>   |                | <b>m</b>   | <b>m</b>   | <b>m</b>   |                |
| <b>C9</b>  | O1         | C5         | 113.1(7)       | C3         | C4         | C5         | 124.0(11)      |
| <b>C8</b>  | O2         | C6         | 120.8(10)      | C4         | C5         | O1         | 118.8(10)      |

|                       |    |                 |           |    |    |    |           |
|-----------------------|----|-----------------|-----------|----|----|----|-----------|
| <b>C9</b>             | N1 | N1 <sup>1</sup> | 116.5(6)  | C6 | C5 | O1 | 121.5(11) |
| <b>N2<sup>1</sup></b> | N2 | C9              | 114.1(4)  | C6 | C5 | C4 | 119.1(12) |
| <b>C3<sup>2</sup></b> | C1 | C2              | 115.6(7)  | C5 | C6 | O2 | 116.0(12) |
| <b>C3</b>             | C2 | C1              | 124.3(11) | C7 | C6 | O2 | 127.4(12) |
| <b>C7</b>             | C2 | C1              | 114.8(11) | C7 | C6 | C5 | 116.6(12) |
| <b>C7</b>             | C2 | C3              | 120.9(10) | C6 | C7 | C2 | 124.0(11) |
| <b>C2</b>             | C3 | C1 <sup>3</sup> | 126.6(10) | O1 | C9 | N2 | 118.0(7)  |
| <b>C4</b>             | C3 | C1 <sup>3</sup> | 117.7(11) | N1 | C9 | O1 | 112.5(8)  |
| <b>C4</b>             | C3 | C2              | 115.3(11) | N1 | C9 | N2 | 129.4(9)  |

<sup>1</sup>+X,+Y,1/2-Z; <sup>2</sup>+Y-X,1-X,+Z; <sup>3</sup>1-Y,1+X-Y,+Z

**Table S6.** Torsion Angles for cryptophane **3**.

| <b>A</b>              | <b>B</b> | <b>C</b> | <b>D</b>        | <b>Angle/°</b> | <b>A</b> | <b>B</b> | <b>C</b> | <b>D</b>        | <b>Angle/°</b> |
|-----------------------|----------|----------|-----------------|----------------|----------|----------|----------|-----------------|----------------|
| <b>O1</b>             | C5       | C6       | O2              | -4.9(15)       | C3       | C2       | C7       | C6              | 0.1(16)        |
| <b>O1</b>             | C5       | C6       | C7              | 172.1(8)       | C3       | C4       | C5       | O1              | -171.0(8)      |
| <b>O2</b>             | C6       | C7       | C2              | 175.5(9)       | C3       | C4       | C5       | C6              | 0.7(15)        |
| <b>N1<sup>1</sup></b> | N1       | C9       | O1              | -178.4(6)      | C4       | C5       | C6       | O2              | -176.3(8)      |
| <b>N1<sup>1</sup></b> | N1       | C9       | N2              | -1.4(14)       | C4       | C5       | C6       | C7              | 0.7(16)        |
| <b>N2<sup>1</sup></b> | N2       | C9       | O1              | 178.3(6)       | C5       | O1       | C9       | N1              | -168.2(9)      |
| <b>N2<sup>1</sup></b> | N2       | C9       | N1              | 1.3(13)        | C5       | O1       | C9       | N2              | 14.3(13)       |
| <b>C1</b>             | C2       | C3       | C1 <sup>2</sup> | -4.2(16)       | C5       | C6       | C7       | C2              | -1.1(17)       |
| <b>C1</b>             | C2       | C3       | C4              | -177.0(8)      | C7       | C2       | C3       | C1 <sup>2</sup> | 173.9(9)       |
| <b>C1</b>             | C2       | C7       | C6              | 178.5(9)       | C7       | C2       | C3       | C4              | 1.2(15)        |
| <b>C1<sup>2</sup></b> | C3       | C4       | C5              | -175.0(8)      | C8       | O2       | C6       | C5              | -165.4(11)     |
| <b>C2</b>             | C3       | C4       | C5              | -1.6(14)       | C8       | O2       | C6       | C7              | 18.1(17)       |
| <b>C3<sup>3</sup></b> | C1       | C2       | C3              | 94.6(13)       | C9       | O1       | C5       | C4              | -119.4(9)      |
| <b>C3<sup>3</sup></b> | C1       | C2       | C7              | -83.7(12)      | C9       | O1       | C5       | C6              | 69.2(12)       |

<sup>1</sup>+X,+Y,1/2-Z; <sup>2</sup>1-Y,1+X-Y,+Z; <sup>3</sup>+Y-X,1-X,+Z



**Table S7.** Hydrogen Atom Coordinates ( $\text{\AA}\times 10^4$ ) and Isotropic Displacement Parameters ( $\text{\AA}^2\times 10^3$ ) for cryptophane **3**.

| <b>Ato</b> | <b>x</b> | <b>y</b> | <b>z</b> | <b>U(eq)</b> |
|------------|----------|----------|----------|--------------|
| <b>m</b>   |          |          |          |              |
| <b>H1A</b> | 5547.54  | 8115.59  | 5330.2   | 169          |
| <b>H1B</b> | 4348.11  | 7308.48  | 5589.6   | 169          |
| <b>H4</b>  | 2328.58  | 8528.71  | 4487.66  | 128          |
| <b>H7</b>  | 5826.84  | 9184.45  | 4418.55  | 134          |
| <b>H8A</b> | 6459.37  | 10116.27 | 3229.38  | 231          |
| <b>H8B</b> | 6936.91  | 10647.4  | 3910.69  | 231          |
| <b>H8C</b> | 7015.52  | 11406.48 | 3325     | 231          |

**Table S8.** Solvent masks information for cryptophane **3**.

| <b>Number</b> | <b>X</b> | <b>Y</b> | <b>Z</b> | <b>Volume</b> | <b>Electron count</b> | <b>Content</b> |
|---------------|----------|----------|----------|---------------|-----------------------|----------------|
| <b>1</b>      | -0.261   | -0.524   | -0.312   | 1444.3        | 549.0                 | ?              |
| <b>2</b>      | 0.333    | 0.667    | 0.750    | 102.4         | 42.3                  | ?              |
| <b>3</b>      | 0.667    | 0.333    | 0.250    | 102.4         | 42.2                  | ?              |

#### Crystal structure determination of cryptophane **3**

**Crystal Data** for  $\text{C}_9\text{H}_7\text{N}_2\text{O}_2$  ( $M = 175.17$  g/mol): hexagonal, space group  $P6_3/m$  (no. 176),  $a = 14.165(2)$   $\text{\AA}$ ,  $c = 20.997(3)$   $\text{\AA}$ ,  $V = 3648.3(13)$   $\text{\AA}^3$ ,  $Z = 12$ ,  $T = 180.00(10)$  K,  $\mu(\text{Cu K}\alpha) = 0.581$   $\text{mm}^{-1}$ ,  $D_{\text{calc}} = 0.957$   $\text{g/cm}^3$ , 8709 reflections measured ( $8.348^\circ \leq 2\theta \leq 151.546^\circ$ ), 2521 unique ( $R_{\text{int}} = 0.0481$ ,  $R_{\text{sigma}} = 0.0507$ ) which were used in all calculations. The final  $R_1$  was 0.1751 ( $I > 2\sigma(I)$ ) and  $wR_2$  was 0.3118 (all data).

120

|   |           |           |           |
|---|-----------|-----------|-----------|
| O | -2.257901 | 12.564117 | 7.880174  |
| O | 0.481610  | 12.978750 | 7.733195  |
| N | -2.788380 | 13.392157 | 6.011441  |
| N | -1.455454 | 11.412223 | 5.961048  |
| C | 1.396669  | 9.328017  | 10.914241 |
| H | 2.110224  | 9.955597  | 11.191821 |
| H | 0.982867  | 8.965495  | 11.736483 |
| C | 0.309505  | 10.133975 | 10.126853 |
| C | -1.059542 | 9.880043  | 10.198243 |
| C | -1.804621 | 10.618531 | 9.421354  |
| H | -2.742025 | 10.462382 | 9.422740  |
| C | -1.293264 | 11.656341 | 8.562577  |
| C | 0.061618  | 11.893099 | 8.533181  |
| C | 0.809530  | 11.130076 | 9.295372  |
| H | 1.748832  | 11.266794 | 9.277629  |
| C | 1.728838  | 13.119824 | 7.405642  |
| H | 1.984849  | 12.409881 | 6.780729  |
| H | 2.285112  | 13.061432 | 8.211276  |
| H | 1.858845  | 13.992614 | 6.981503  |
| C | -2.178577 | 12.507688 | 6.546865  |
| O | -2.669394 | 4.029792  | 7.880174  |
| O | -4.398232 | 6.194961  | 7.733195  |
| N | -3.121258 | 3.156363  | 6.011441  |
| N | -2.073048 | 5.300679  | 5.961048  |
| C | -1.694134 | 8.812792  | 10.914241 |
| H | -2.594412 | 9.116959  | 11.191821 |
| H | -1.173280 | 8.635690  | 11.736483 |
| C | -1.848532 | 7.468302  | 10.126853 |
| C | -0.944097 | 6.409638  | 10.198243 |
| C | -1.211107 | 5.395136  | 9.421354  |
| H | -0.607176 | 4.661395  | 9.422740  |

|   |           |           |           |
|---|-----------|-----------|-----------|
| C | -2.365555 | 5.319080  | 8.562577  |
| C | -3.248034 | 6.374063  | 8.533181  |
| C | -2.961193 | 7.403285  | 9.295372  |
| H | -3.549246 | 8.148386  | 9.277629  |
| C | -5.144020 | 7.204556  | 7.405642  |
| H | -4.657197 | 7.781239  | 6.780729  |
| H | -5.371588 | 7.715499  | 8.211276  |
| H | -5.964881 | 6.880750  | 6.981503  |
| C | -2.660187 | 4.126703  | 6.546865  |
| O | 4.927295  | 7.940591  | 7.880174  |
| O | 3.916623  | 5.360788  | 7.733195  |
| N | 5.909638  | 7.985980  | 6.011441  |
| N | 3.528502  | 7.821599  | 5.961048  |
| C | 0.297465  | 6.393691  | 10.914241 |
| H | 0.484188  | 5.461944  | 11.191821 |
| H | 0.190413  | 6.933315  | 11.736483 |
| C | 1.539027  | 6.932223  | 10.126853 |
| C | 2.003639  | 8.244819  | 10.198243 |
| C | 3.015729  | 8.520832  | 9.421354  |
| H | 3.349201  | 9.410723  | 9.422740  |
| C | 3.658820  | 7.559079  | 8.562577  |
| C | 3.186417  | 6.267338  | 8.533181  |
| C | 2.151664  | 6.001139  | 9.295372  |
| H | 1.800414  | 5.119320  | 9.277629  |
| C | 3.415181  | 4.210120  | 7.405642  |
| H | 2.672348  | 4.343379  | 6.780729  |
| H | 3.086476  | 3.757569  | 8.211276  |
| H | 4.106037  | 3.661136  | 6.981503  |
| C | 4.838764  | 7.900109  | 6.546865  |
| O | -2.257901 | 12.564117 | 2.618326  |
| O | 0.481610  | 12.978750 | 2.765305  |
| N | -2.788380 | 13.392157 | 4.487059  |

|   |           |           |           |
|---|-----------|-----------|-----------|
| N | -1.455454 | 11.412223 | 4.537452  |
| C | 1.396669  | 9.328017  | -0.415741 |
| H | 2.110224  | 9.955597  | -0.693321 |
| H | 0.982867  | 8.965495  | -1.237983 |
| C | 0.309505  | 10.133975 | 0.371647  |
| C | -1.059542 | 9.880043  | 0.300257  |
| C | -1.804621 | 10.618531 | 1.077146  |
| H | -2.742025 | 10.462382 | 1.075760  |
| C | -1.293264 | 11.656341 | 1.935923  |
| C | 0.061618  | 11.893099 | 1.965319  |
| C | 0.809530  | 11.130076 | 1.203128  |
| H | 1.748832  | 11.266794 | 1.220871  |
| C | 1.728838  | 13.119824 | 3.092858  |
| H | 1.984849  | 12.409881 | 3.717771  |
| H | 2.285112  | 13.061432 | 2.287224  |
| H | 1.858845  | 13.992614 | 3.516997  |
| C | -2.178577 | 12.507688 | 3.951635  |
| O | 4.927295  | 7.940591  | 2.618326  |
| O | 3.916623  | 5.360788  | 2.765305  |
| N | 5.909638  | 7.985980  | 4.487059  |
| N | 3.528502  | 7.821599  | 4.537452  |
| C | 0.297465  | 6.393691  | -0.415741 |
| H | 0.484188  | 5.461944  | -0.693321 |
| H | 0.190413  | 6.933315  | -1.237983 |
| C | 1.539027  | 6.932223  | 0.371647  |
| C | 2.003639  | 8.244819  | 0.300257  |
| C | 3.015729  | 8.520832  | 1.077146  |
| H | 3.349201  | 9.410723  | 1.075760  |
| C | 3.658820  | 7.559079  | 1.935923  |
| C | 3.186417  | 6.267338  | 1.965319  |
| C | 2.151664  | 6.001139  | 1.203128  |
| H | 1.800414  | 5.119320  | 1.220871  |

|   |           |          |           |
|---|-----------|----------|-----------|
| C | 3.415181  | 4.210120 | 3.092858  |
| H | 2.672348  | 4.343379 | 3.717771  |
| H | 3.086476  | 3.757569 | 2.287224  |
| H | 4.106037  | 3.661136 | 3.516997  |
| C | 4.838764  | 7.900109 | 3.951635  |
| O | -2.669394 | 4.029792 | 2.618326  |
| O | -4.398232 | 6.194961 | 2.765305  |
| N | -3.121258 | 3.156363 | 4.487059  |
| N | -2.073048 | 5.300679 | 4.537452  |
| C | -1.694134 | 8.812792 | -0.415741 |
| H | -2.594412 | 9.116959 | -0.693321 |
| H | -1.173280 | 8.635690 | -1.237983 |
| C | -1.848532 | 7.468302 | 0.371647  |
| C | -0.944097 | 6.409638 | 0.300257  |
| C | -1.211107 | 5.395136 | 1.077146  |
| H | -0.607176 | 4.661395 | 1.075760  |
| C | -2.365555 | 5.319080 | 1.935923  |
| C | -3.248034 | 6.374063 | 1.965319  |
| C | -2.961193 | 7.403285 | 1.203128  |
| H | -3.549246 | 8.148386 | 1.220871  |
| C | -5.144020 | 7.204556 | 3.092858  |
| H | -4.657197 | 7.781239 | 3.717771  |
| H | -5.371588 | 7.715499 | 2.287224  |
| H | -5.964881 | 6.880750 | 3.516997  |
| C | -2.660187 | 4.126703 | 3.951635  |

## 5. DFT Calculations

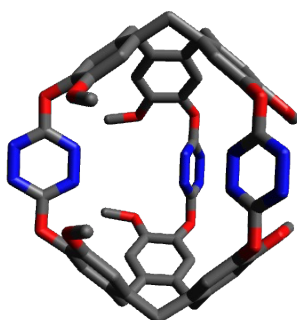

***syn*** configuration of **3**

**Figure S2.** Geometry optimization of the *syn* cryptophane **3** in the gas phase (PBE0-D3/def2-TZVP).

Calculations within DFT methods were performed with the TURBOMOLE program package.<sup>7</sup> The structures were fully optimized (gas-phase calculations), at the PBE0-D3/def2-TZVP level of theory.<sup>891011</sup> The RI approximation was employed, by exploiting the corresponding auxiliary basis sets.<sup>12</sup> Frequency calculations were performed to verify that structures are minima on their potential energy surface.

Optimized structure of *syn*-cryptophane

120

Energy = -3639.765740671

|   |            |            |            |
|---|------------|------------|------------|
| O | 2.8292254  | -3.9075176 | -2.5886691 |
| O | -4.7986222 | -0.4964223 | -2.5886691 |
| C | -0.4583709 | 1.9215803  | -4.8806258 |
| C | -1.4079244 | 1.0711959  | -5.6954282 |
| C | 0.9257090  | 1.7589874  | -4.9052150 |
| C | -1.0188280 | 2.8983429  | -4.0541393 |
| C | -1.4349519 | -1.3577510 | -4.8806258 |
| C | -1.9861823 | -0.0778062 | -4.9052150 |
| C | 1.1416140  | 3.5506828  | -3.2966580 |
| C | 1.8933228  | -0.5638293 | -4.8806258 |
| C | 1.0604733  | -1.6811812 | -4.9052150 |
| C | 1.4036232  | -2.7782354 | -4.1142537 |

C -0.2237207 -1.7548962 -5.6954282  
C 2.5041745 -2.7640082 -3.2966580  
C 3.0194526 -0.5668406 -4.0541393  
C 1.6316451 0.6837003 -5.6954282  
C -3.6457885 -0.7866746 -3.2966580  
O 1.9693968 4.4039399 -2.5886691  
C 1.7042108 2.6046910 -4.1142537  
C -2.0006246 -2.3315024 -4.0541393  
C -3.1078340 0.1735444 -4.1142537  
C 1.6314681 0.6840032 5.6957171  
N 2.6468853 5.3017454 -0.6488795  
C 1.7037130 2.6048641 4.1142371  
C 1.4040220 -2.7778908 4.1142371  
N 2.6466264 5.3017031 0.6489205  
C 3.0194013 -0.5661216 4.0541100  
C -3.6452997 -0.7872331 3.2964043  
O 1.9685016 4.4039597 2.5884518  
C -3.1077350 0.1730267 4.1142371  
C 1.0607645 -1.6809861 4.9053670  
C -0.2233699 -1.7548945 5.6957171  
C -1.0194249 2.8979390 4.0541100  
C -1.9861589 -0.0781560 4.9053670  
C 1.8934132 -0.5634646 4.8807870  
C 2.5044137 -2.7633056 3.2964043  
C -1.4080982 1.0708913 5.6957171  
O -4.7981918 -0.4972074 2.5884518  
N 1.3408146 3.3317197 0.6530047  
C -1.9999763 -2.3318174 4.0541100  
C -1.4346813 -1.3580116 4.8807870  
C 1.1408860 3.5505387 3.2964043  
C 0.9253944 1.7591420 4.9053670  
C -0.4587319 1.9214762 4.8807870

|   |            |            |            |
|---|------------|------------|------------|
| O | 2.8296901  | -3.9067522 | 2.5884518  |
| N | -3.5559298 | -0.5044604 | -0.6534192 |
| N | -3.5557612 | -0.5046803 | 0.6530047  |
| N | -5.9147227 | -0.3588059 | 0.6489205  |
| C | -4.7331467 | -0.4736305 | -1.2556535 |
| N | -5.9148889 | -0.3586028 | -0.6488795 |
| C | -4.7328670 | -0.4740334 | 1.2554521  |
| N | 3.2680036  | -4.9431426 | -0.6488795 |
| N | 3.2680964  | -4.9428972 | 0.6489205  |
| N | 2.2149466  | -2.8270394 | 0.6530047  |
| N | 2.2148404  | -2.8272954 | -0.6534192 |
| N | 1.3410894  | 3.3317557  | -0.6534192 |
| C | 2.7769585  | -3.8617664 | 1.2554521  |
| C | 1.9563973  | 4.3358405  | -1.2556535 |
| C | 1.9559085  | 4.3357998  | 1.2554521  |
| C | 2.7767494  | -3.8622100 | -1.2556535 |
| H | -0.9186317 | 0.7128772  | -6.6000106 |
| H | -2.2308885 | 1.7064853  | -6.0332501 |
| H | 0.7971137  | -3.6765768 | -4.1251599 |
| H | -1.5662145 | -3.3226085 | -4.0488781 |
| H | -0.1580540 | -1.1519970 | -6.6000106 |
| H | -0.3624154 | -2.7852488 | -6.0332501 |
| H | -3.5827494 | 1.1473194  | 4.1252313  |
| H | 2.5933039  | 1.0787635  | -6.0332501 |
| H | 1.0766856  | 0.4391197  | -6.6000106 |
| H | 3.6605706  | 0.3049227  | -4.0488781 |
| H | -2.0943561 | 3.0176858  | -4.0488781 |
| H | 2.7854521  | 2.5286091  | -4.1251599 |
| H | 1.0764201  | 0.4393772  | 6.6001640  |
| H | 2.5930284  | 1.0792042  | 6.0335859  |
| H | 2.7849824  | 2.5290923  | 4.1252313  |
| H | -2.0949989 | 3.0169824  | 4.0488323  |



H 0.7977669 -3.6764117 4.1252313  
H 3.6602829 0.3058311 4.0488323  
H -0.3618959 -2.7852306 6.0335859  
H -0.1576982 -1.1518958 6.6001640  
H -2.2311325 1.7060263 6.0335859  
H -0.9187219 0.7125186 6.6001640  
H -1.5652840 -3.3228135 4.0488323  
H -3.5825657 1.1479677 -4.1251599  
C -0.2444827 3.7112579 3.2461518  
C -3.0918022 -2.0673572 3.2461518  
C 3.3362849 -1.6439007 3.2461518  
C 3.3363114 -1.6448229 -3.2464610  
C -0.2436973 3.7117419 -3.2464610  
C -3.0926141 -2.0669190 -3.2464610  
O -3.6829483 -2.9471849 2.4138214  
O -0.7108628 4.6631192 2.4138214  
O 4.3938111 -1.7159343 2.4138214  
O 4.3940574 -1.7171951 -2.4144434  
O -0.7098942 4.6639629 -2.4144434  
O -3.6841633 -2.9467678 -2.4144434  
C -3.0524537 -4.1895743 -2.2160659  
H -2.0284106 -4.0581756 -1.8503951  
H -3.6428715 -4.7118652 -1.4652844  
H -3.0380137 -4.7853711 -3.1350183  
C 5.1545046 -0.5487153 -2.2160659  
H 4.5286885 0.2724326 -1.8503951  
H 5.9020307 -0.7988867 -1.4652844  
H 5.6632598 -0.2383115 -3.1350183  
C -2.1020509 4.7382895 -2.2160659  
H -2.5002778 3.7857429 -1.8503951  
H -2.2591592 5.5107518 -1.4652844  
H -2.6252461 5.0236826 -3.1350183

|   |            |            |           |
|---|------------|------------|-----------|
| C | 5.1544960  | -0.5474900 | 2.2161441 |
| H | 5.9021473  | -0.7974217 | 1.4654362 |
| H | 4.5289083  | 0.2739423  | 1.8507085 |
| H | 5.6630932  | -0.2375778 | 3.1353810 |
| C | -3.0513883 | -4.1901795 | 2.2161441 |
| H | -3.6416610 | -4.7126986 | 1.4654362 |
| H | -2.0272132 | -4.0591207 | 1.8507085 |
| H | -3.0372950 | -4.7855937 | 3.1353810 |
| C | -2.1031077 | 4.7376695  | 2.2161441 |
| H | -2.2604862 | 5.5101203  | 1.4654362 |
| H | -2.5016951 | 3.7851785  | 1.8507085 |
| H | -2.6257982 | 5.0231714  | 3.1353810 |

Optimized structure of [3.Me<sub>4</sub>N<sup>+</sup>Cl<sup>-</sup>] complex

138

Energy= -4314.096939096

|   |            |            |           |
|---|------------|------------|-----------|
| O | -3.4002397 | -3.4603182 | 2.7846670 |
| O | 5.0284709  | -1.4018176 | 2.1614321 |
| C | 1.1284830  | 1.6381731  | 4.7321502 |
| C | 2.0257521  | 0.6306287  | 5.4208138 |
| C | -0.2507524 | 1.7054948  | 4.9295001 |
| C | 1.7386982  | 2.5429133  | 3.8588821 |
| C | 1.5828248  | -1.7022408 | 4.4704033 |
| C | 2.3691215  | -0.5519222 | 4.5488166 |
| C | -0.3519331 | 3.6058210  | 3.4340583 |
| C | -1.6112614 | -0.4169044 | 4.9879344 |
| C | -0.9480759 | -1.6279316 | 4.7948759 |
| C | -1.5764327 | -2.6107283 | 4.0287561 |
| C | 0.4031908  | -1.9503920 | 5.3832222 |
| C | -2.8154116 | -2.4175907 | 3.4722143 |
| C | -2.8781026 | -0.2329712 | 4.4272849 |
| C | -1.0258329 | 0.7296249  | 5.7832739 |

C 3.8336659 -1.4737551 2.8647291  
O -1.0856729 4.6466801 2.8799838  
C -0.9653487 2.7136414 4.2764027  
C 1.9049044 -2.6937452 3.5423456  
C 3.5102649 -0.4766804 3.7497495  
C -1.8318615 1.1498512 -5.4147302  
N -1.6740760 5.7895669 1.0198123  
C -1.5230323 3.0337257 -3.8092248  
C -2.0834076 -2.2975173 -3.7963097  
N -1.7550556 5.8466653 -0.2744515  
C -3.4401056 0.0863336 -3.8468292  
C 3.4573076 -1.2304801 -3.5382090  
O -1.4030355 4.8694903 -2.2840211  
C 2.9762767 -0.1610551 -4.2497963  
C -1.5904694 -1.2656307 -4.5981407  
C -0.3673474 -1.5471754 -5.4400673  
C 1.2111272 2.8288666 -3.8203805  
C 1.7198578 -0.1958448 -4.8543912  
C -2.2785515 -0.0523513 -4.6109917  
C -3.2274272 -2.1518971 -3.0521103  
C 1.2315874 1.0477281 -5.5556070  
O 4.7366491 -1.1799620 -2.9959598  
N -1.0801748 3.5957429 -0.4161424  
C 1.4629469 -2.4431333 -4.0126828  
C 0.9665792 -1.3676446 -4.7507005  
C -0.7771687 3.8642741 -3.0113522  
C -0.9281526 2.0720300 -4.6311042  
C 0.4641505 1.9924757 -4.6548629  
O -3.7176111 -3.2465364 -2.3703078  
N 3.8219230 -0.7821763 0.3188634  
N 3.7520181 -0.7250947 -0.9837583  
N 5.9980238 -1.4099335 -1.1340731

|   |            |            |            |
|---|------------|------------|------------|
| C | 4.9436613  | -1.2393765 | 0.8436042  |
| N | 6.0682191  | -1.4662521 | 0.1594268  |
| C | 4.8059754  | -1.1305441 | -1.6682817 |
| N | -4.1283127 | -4.3502854 | 0.8479732  |
| N | -4.2097164 | -4.2965497 | -0.4447157 |
| N | -3.2561847 | -2.1436346 | -0.4149606 |
| N | -3.1727944 | -2.1970887 | 0.8841632  |
| N | -1.0060350 | 3.5353662  | 0.8844543  |
| C | -3.6966015 | -3.2188317 | -1.0381980 |
| C | -1.2316387 | 4.6485626  | 1.5550653  |
| C | -1.3838465 | 4.7596523  | -0.9563309 |
| C | -3.5457557 | -3.3214457 | 1.4603499  |
| H | 1.5771520  | 0.3048269  | 6.3581445  |
| H | 2.9531922  | 1.1392554  | 5.6962973  |
| H | -1.0985053 | -3.5679967 | 3.8551240  |
| H | 1.2739099  | -3.5699450 | 3.4695985  |
| H | 0.5436043  | -1.4174144 | 6.3230939  |
| H | 0.4082409  | -3.0114023 | 5.6453088  |
| H | 3.6080021  | 0.7160769  | -4.3372004 |
| H | -1.8464184 | 1.2684632  | 6.2632887  |
| H | -0.4046632 | 0.3511882  | 6.5941218  |
| H | -3.3935438 | 0.7017626  | 4.6078005  |
| H | 2.8082943  | 2.4723923  | 3.7085713  |
| H | -2.0338813 | 2.8141411  | 4.4292592  |
| H | -1.3504710 | 0.8335969  | -6.3391279 |
| H | -2.7196414 | 1.7106357  | -5.7173304 |
| H | -2.6011403 | 3.1463161  | -3.7908335 |
| H | 2.2901235  | 2.7465596  | -3.8407816 |
| H | -1.5733512 | -3.2517058 | -3.7318117 |
| H | -3.9782412 | 1.0248193  | -3.8879979 |
| H | -0.4279791 | -2.5868618 | -5.7705159 |
| H | -0.3951209 | -0.9497269 | -6.3513516 |

H 2.0994633 1.5874332 -5.9435208  
H 0.6315306 0.7886423 -6.4266091  
H 0.8590347 -3.3353314 -3.9103720  
H 4.1783430 0.3747091 3.8200153  
C 0.6154039 3.7578339 -2.9851980  
C 2.6998686 -2.3946784 -3.3855770  
C -3.9403443 -0.9504394 -3.0760558  
C -3.5019370 -1.2177550 3.6781012  
C 1.0219194 3.5226849 3.1945113  
C 3.0103093 -2.5930589 2.7105037  
O 3.2413697 -3.3668398 -2.6418166  
O 1.2674134 4.5838018 -2.1394203  
O -5.0744391 -0.9043445 -2.3525167  
O -4.7290267 -1.1235503 3.1365302  
O 1.5371089 4.4183487 2.3261465  
O 3.3695847 -3.4796343 1.7732736  
C 2.4869620 -4.5601067 1.4931440  
H 1.5179867 -4.2098088 1.1197340  
H 2.9754240 -5.1380057 0.7121963  
H 2.3560977 -5.1942154 2.3754063  
C -5.3940875 0.1130055 3.2162691  
H -4.8062370 0.9108926 2.7485546  
H -6.3295186 -0.0111372 2.6739721  
H -5.6152204 0.3866082 4.2538232  
C 2.9135146 4.3386867 2.0373123  
H 3.1733522 3.3693039 1.5973412  
H 3.1167107 5.1299251 1.3183234  
H 3.5211585 4.5038188 2.9328159  
C -5.7539802 0.3232401 -2.2671973  
H -6.6004021 0.1554276 -1.6037935  
H -5.1119798 1.1052120 -1.8455622  
H -6.1247632 0.6490147 -3.2453908

|    |            |            |            |
|----|------------|------------|------------|
| C  | 2.5016484  | -4.5717308 | -2.4753449 |
| H  | 3.1339035  | -5.2165307 | -1.8681197 |
| H  | 1.5497165  | -4.3911311 | -1.9618840 |
| H  | 2.3315920  | -5.0523742 | -3.4442459 |
| C  | 2.6716957  | 4.4875834  | -2.0796617 |
| H  | 2.9933391  | 5.2232664  | -1.3450550 |
| H  | 2.9903517  | 3.4887809  | -1.7608152 |
| H  | 3.1306501  | 4.7220110  | -3.0455189 |
| Cl | -0.5224941 | -3.9290979 | -0.6248608 |
| C  | -1.3592067 | 0.4366173  | -0.0985536 |
| H  | -1.5968917 | 0.8446544  | 0.8820927  |
| H  | -1.4761682 | 1.2079302  | -0.8564150 |
| H  | -1.9872833 | -0.4206942 | -0.3255864 |
| C  | 0.3559855  | -0.6433835 | -1.4112548 |
| H  | 0.0647628  | 0.0464667  | -2.2024579 |
| H  | 1.4241067  | -0.8372145 | -1.4643635 |
| H  | -0.1952997 | -1.5836833 | -1.4708832 |
| C  | 0.2836027  | -0.9777033 | 1.0021428  |
| H  | 1.3440474  | -1.2182445 | 1.0251949  |
| H  | -0.0122561 | -0.5124700 | 1.9419410  |
| H  | -0.2930487 | -1.8812211 | 0.7963459  |
| C  | 0.9542247  | 1.1621341  | 0.0974941  |
| H  | 0.6919351  | 1.6488009  | 1.0347021  |
| H  | 1.9794190  | 0.8017475  | 0.1273723  |
| H  | 0.8084099  | 1.8568103  | -0.7274732 |
| N  | 0.0588227  | -0.0018579 | -0.0999103 |

Optimized structure of [3.Me<sub>4</sub>N<sup>+</sup>] complex

137

Energy= -3853.827660633

|   |            |            |           |
|---|------------|------------|-----------|
| O | -4.2602836 | -0.9507990 | 3.4324685 |
| O | 4.3592256  | -0.9272323 | 3.4527134 |

|   |            |            |            |
|---|------------|------------|------------|
| C | 1.1472749  | 3.6201117  | 3.4026682  |
| C | 1.7243150  | 2.9951096  | 4.6548604  |
| C | -0.1857094 | 4.0137730  | 3.2875491  |
| C | 2.0154545  | 3.8160929  | 2.3248566  |
| C | 0.8165688  | 0.6267860  | 4.9956372  |
| C | 1.8299360  | 1.4919071  | 4.5807601  |
| C | 0.2742012  | 4.8437174  | 1.0644603  |
| C | -1.9792277 | 2.4627711  | 4.1203592  |
| C | -1.6284823 | 1.2595733  | 4.7332692  |
| C | -2.4071401 | 0.1312556  | 4.4672740  |
| C | -0.4529752 | 1.1036473  | 5.6676545  |
| C | -3.4719030 | 0.1772918  | 3.6041838  |
| C | -3.0675555 | 2.4960741  | 3.2441070  |
| C | -1.2300381 | 3.7580667  | 4.3470032  |
| C | 3.1497844  | -0.4150055 | 3.8982012  |
| O | -0.1457575 | 5.5564169  | -0.0488722 |
| C | -0.5907055 | 4.6463340  | 2.1098274  |
| C | 0.9770613  | -0.7503196 | 4.8191312  |
| C | 2.9991085  | 0.9396293  | 4.0530806  |
| C | -1.1885254 | -1.5513490 | -5.5415254 |
| N | -0.3548705 | 5.6410376  | -2.2959633 |
| C | -0.5611101 | 0.8064221  | -5.0412013 |
| C | -2.3785704 | -3.6585007 | -2.5925300 |
| N | -0.3502471 | 5.0295077  | -3.4348894 |
| C | -3.0387735 | -1.3358104 | -3.8938608 |
| C | 3.1724998  | -3.4706684 | -1.7858144 |
| O | -0.1274247 | 3.1102560  | -4.6042845 |
| C | 3.0277813  | -2.8506226 | -3.0008665 |
| C | -1.5941214 | -3.2546376 | -3.6748839 |
| C | -0.4134262 | -4.1159809 | -4.0533341 |
| C | 2.0433399  | 0.1778885  | -4.4502100 |
| C | 1.8639776  | -2.9882724 | -3.7605612 |

C -1.9445172 -2.0806531 -4.3420827  
C -3.4490670 -2.9173865 -2.1619601  
C 1.7645898 -2.2190429 -5.0547493  
O 4.3771149 -3.3790906 -1.1044900  
N -0.2790052 2.9522729 -2.3288389  
C 1.0044650 -4.4302866 -2.0302873  
C 0.8501129 -3.8158616 -3.2760713  
C 0.2974370 1.7899870 -4.6224558  
C -0.1505928 -0.5232864 -5.1617532  
C 1.1816256 -0.8320331 -4.8878768  
O -4.2428050 -3.3998644 -1.1319771  
N 3.3647083 -1.2395964 1.4214863  
N 3.3692243 -1.8593939 0.2693117  
N 5.4573061 -2.8133947 0.7990503  
C 4.3643115 -1.4834231 2.2434610  
N 5.4528488 -2.2004527 1.9382748  
C 4.3730191 -2.6764263 0.0259011  
N -5.1076116 -2.5346541 2.0724931  
N -5.1032538 -3.1451889 0.9345990  
N -3.2633831 -1.8463036 0.2335825  
N -3.2678408 -1.2265047 1.3887788  
N -0.2835880 3.5717968 -1.1749191  
C -4.1960181 -2.7532518 0.0286877  
C -0.2362263 4.8879739 -1.1949749  
C -0.2272732 3.6961667 -3.4145997  
C -4.2045389 -1.5602299 2.2522209  
H 1.1494810 3.2989361 5.5281035  
H 2.7263344 3.4042194 4.8047939  
H -2.1942024 -0.8123784 4.9568070  
H 0.1890872 -1.4118298 5.1554620  
H -0.2653485 2.0321229 6.2045137  
H -0.7214318 0.3717844 6.4334345



H 3.8587115 -2.2596817 -3.3694346  
H -1.9513554 4.5782659 4.3293777  
H -0.7880937 3.7741356 5.3417646  
H -3.3366156 3.4394494 2.7869699  
H 3.0487932 3.5112647 2.4299764  
H -1.6061137 5.0102039 2.0017892  
H -0.7394949 -2.3698828 -6.1014264  
H -1.9066549 -1.0860910 -6.2206712  
H -1.5757434 1.0939792 -5.2921669  
H 3.0762009 -0.0744223 -4.2470823  
H -2.1655172 -4.5865283 -2.0741000  
H -3.3075747 -0.4350109 -4.4302153  
H -0.6801141 -5.1594242 -3.8685453  
H -0.2186622 -4.0497794 -5.1225891  
H 2.7692283 -2.1144935 -5.4715318  
H 1.1967854 -2.7807446 -5.7945234  
H 0.2162506 -5.0790712 -1.6705769  
H 3.8295411 1.5765591 3.7698924  
C 1.6213195 1.4873608 -4.2941008  
C 2.1452369 -4.2593259 -1.2624416  
C -3.7969644 -1.7260882 -2.8021571  
C -3.8196132 1.3674732 2.9616630  
C 1.5991389 4.4074863 1.1441527  
C 2.1234349 -1.2910754 4.2591894  
O 2.3612695 -4.7940586 -0.0457683  
O 2.3799590 2.5107143 -3.8564719  
O -4.8489281 -1.0588033 -2.2960751  
O -4.8654197 1.3097771 2.1184647  
O 2.3642522 4.6102200 0.0543193  
O 2.3458393 -2.5996286 4.0329923  
C 1.3593291 -3.5225149 4.4399544  
H 0.4139282 -3.3539420 3.9121311

|   |            |            |            |
|---|------------|------------|------------|
| H | 1.7455198  | -4.5074999 | 4.1863512  |
| H | 1.1868813  | -3.4716602 | 5.5192288  |
| C | -5.2601348 | 2.4975777  | 1.4662975  |
| H | -4.4562414 | 2.8886310  | 0.8330586  |
| H | -6.1132696 | 2.2312522  | 0.8460291  |
| H | -5.5641932 | 3.2643280  | 2.1852642  |
| C | 3.7267341  | 4.2519616  | 0.1234538  |
| H | 3.8483975  | 3.1744712  | 0.2822442  |
| H | 4.1600761  | 4.5284157  | -0.8354099 |
| H | 4.2423403  | 4.7967478  | 0.9200107  |
| C | -5.2444530 | 0.1383818  | -2.9304153 |
| H | -6.1035892 | 0.5049689  | -2.3727554 |
| H | -4.4442387 | 0.8859751  | -2.9014984 |
| H | -5.5398074 | -0.0400884 | -3.9687965 |
| C | 1.3736265  | -5.6462535 | 0.4916298  |
| H | 1.7543052  | -5.9784220 | 1.4551580  |
| H | 0.4256376  | -5.1159602 | 0.6367285  |
| H | 1.2078952  | -6.5179330 | -0.1485696 |
| C | 3.7421737  | 2.2607211  | -3.5892571 |
| H | 4.1702924  | 3.2145872  | -3.2884592 |
| H | 3.8628360  | 1.5340912  | -2.7777902 |
| H | 4.2635272  | 1.8992322  | -4.4807121 |
| C | -0.6797272 | -0.2306332 | -1.2682706 |
| H | -1.6476912 | -0.6697201 | -1.0341549 |
| H | -0.7813156 | 0.7221367  | -1.7842468 |
| H | -0.1038466 | -0.9200937 | -1.8855361 |
| C | 1.3912021  | 0.5847148  | -0.3066796 |
| H | 1.2322378  | 1.5328127  | -0.8139955 |
| H | 1.9324482  | 0.7280027  | 0.6262086  |
| H | 1.9379556  | -0.1097736 | -0.9411517 |
| C | 0.2332952  | -1.3075465 | 0.7015813  |
| H | 0.7874068  | -1.1399453 | 1.6229834  |

|   |            |            |           |
|---|------------|------------|-----------|
| H | -0.7554828 | -1.7079570 | 0.9108684 |
| H | 0.7953362  | -1.9787721 | 0.0552463 |
| C | -0.6877799 | 0.9261364  | 0.8927434 |
| H | -1.6554669 | 0.4845382  | 1.1235351 |
| H | -0.1171794 | 1.0599074  | 1.8117224 |
| H | -0.7902211 | 1.8831897  | 0.3849963 |
| N | 0.0635159  | -0.0060429 | 0.0044061 |

Finally, the structure of the  $[3.NMe_4Cl]$  complex was optimized and a Non-Covalent Interaction analysis was performed with the NCIPLOT tool, Figure S3b.<sup>13</sup> The plot shows the interactions between the  $(Me_4N)^+$  moiety and either the CTV units (both north and south) or the tetrazine rings. Those contribute to the stability of the encapsulated cation. The analysis reveals as well an interaction between the  $Cl^-$  anion and the tetrazine unit, which can be denoted as an anion- $\pi$  interaction. Thus, the presence of the tetrazine contributes to stabilize the whole ion-pair complex.

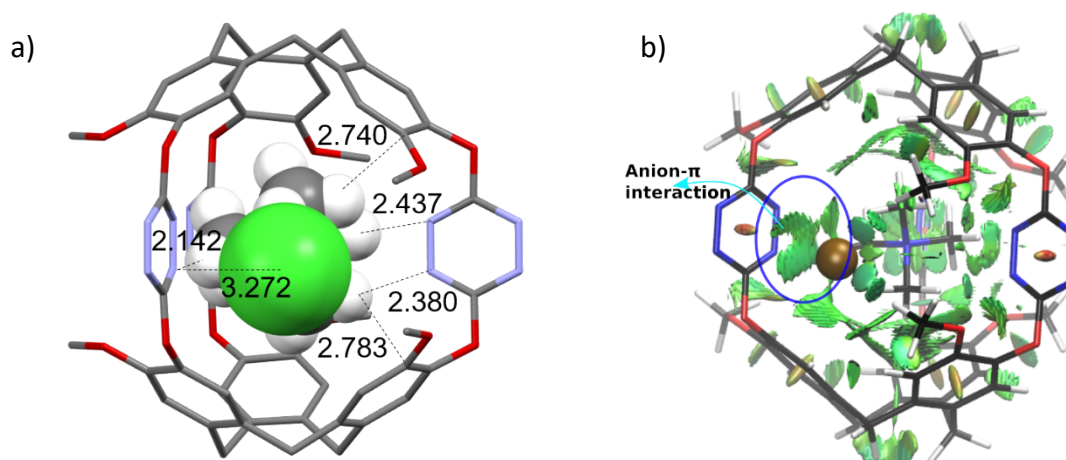

**Figure S3.** a) Selected distances between host and guests of the  $[3.NMe_4Cl]$  complex and b) Non-Covalent Interaction plot of the  $[3.NMe_4Cl]$  complex.

## 6. Supplementary Figures

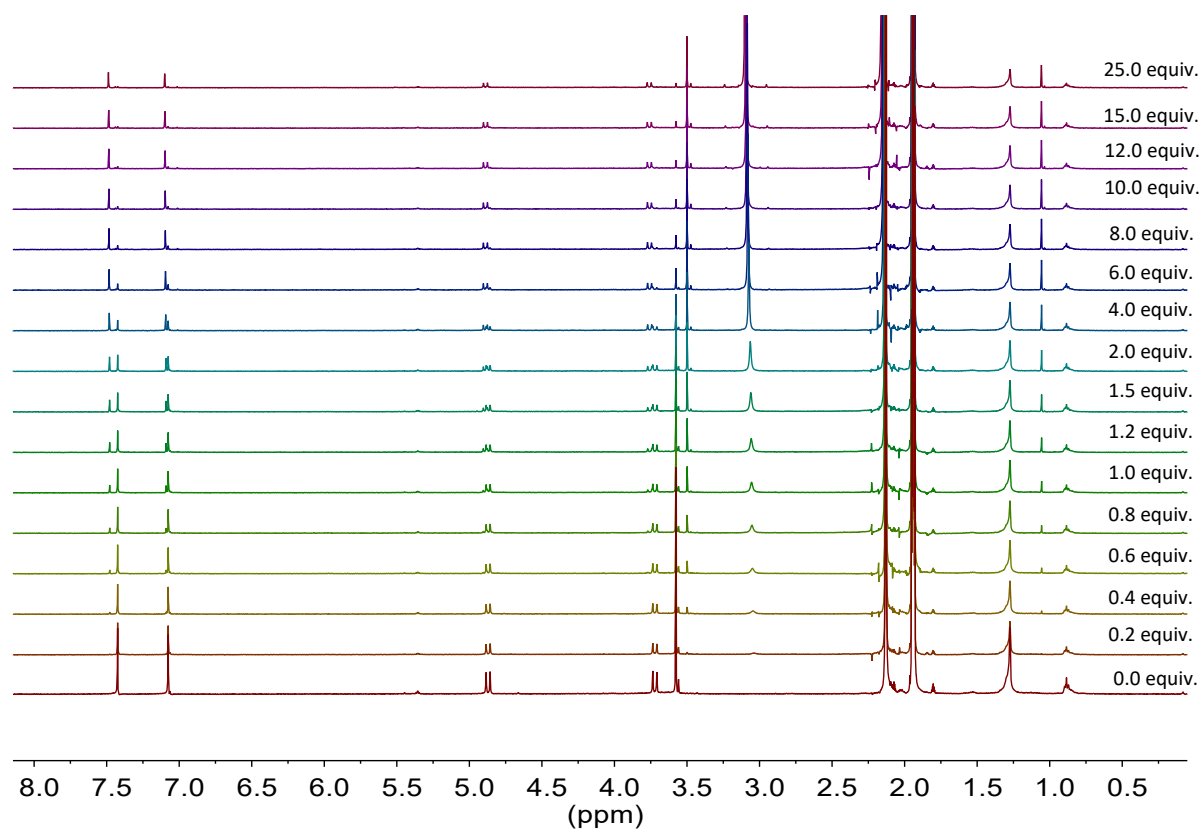

**Figure S4.** <sup>1</sup>H NMR titration (500 MHz, CD<sub>3</sub>CN, 298K) of cryptophane **3** (0.79mM) with tetramethylammonium chloride (19 mM).

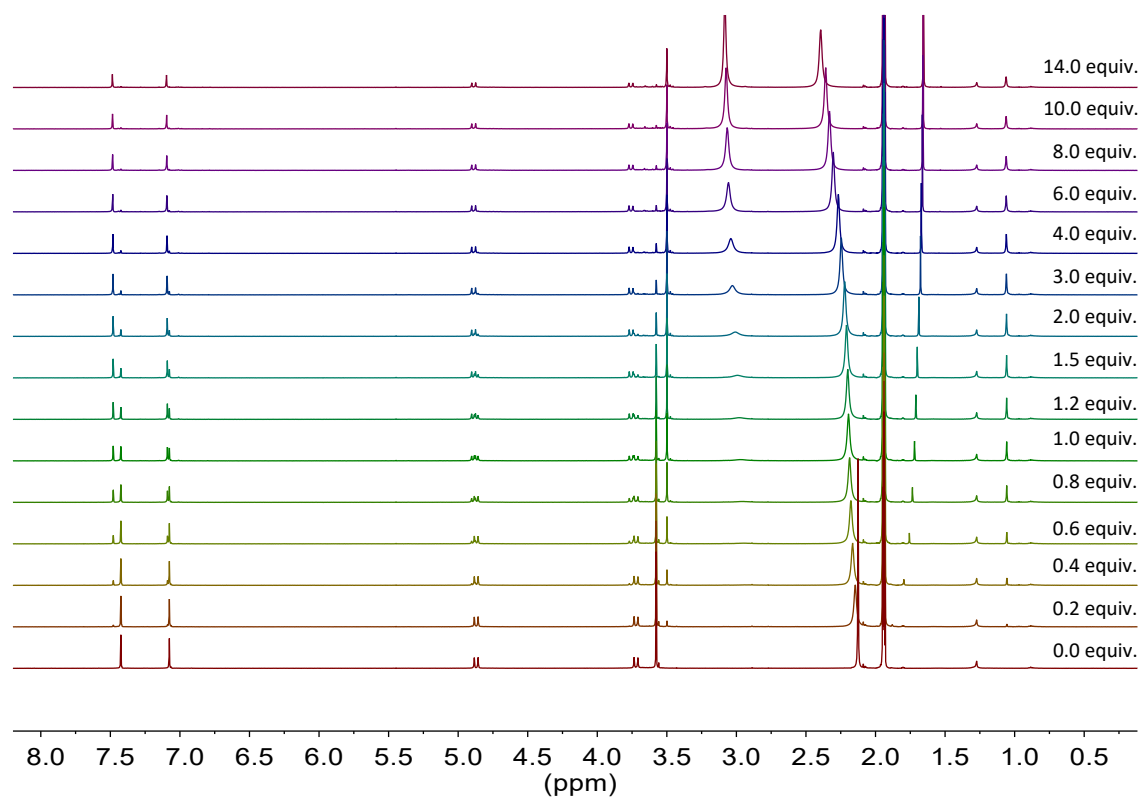

**Figure S5.**  $^1\text{H}$  NMR titration (500 MHz,  $\text{CD}_3\text{CN}$ , 298K) of cryptophane **3** (1 mM) with tetramethylammonium acetate (24 mM).

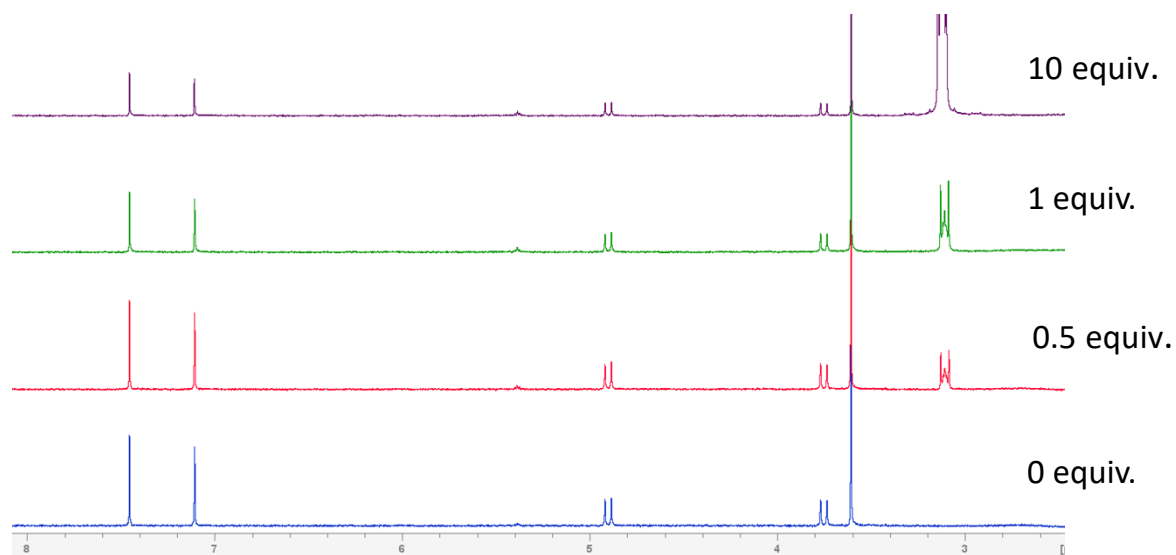

**Figure S6.**  $^1\text{H}$  NMR titration (500 MHz,  $\text{CD}_3\text{CN}$ , 298K) of cryptophane **3** (1mM) with tetrabutylammonium chloride (24 mM).

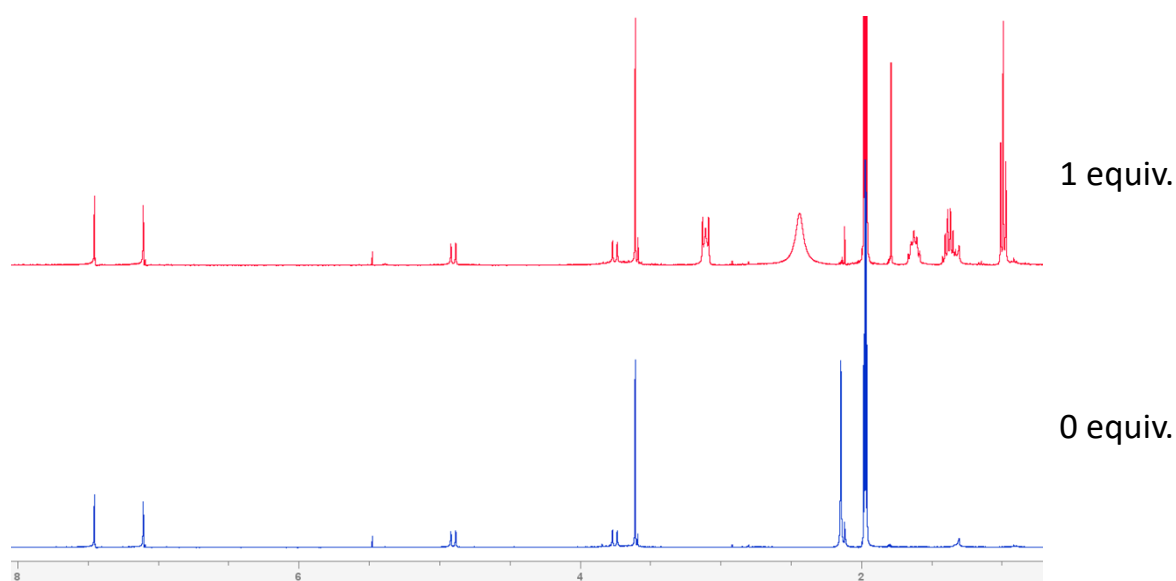

**Figure S7.**  $^1\text{H}$  NMR titration (500 MHz,  $\text{CD}_3\text{CN}$ , 298K) of cryptophane **3** (1 mM) with tetrabutylammonium acetate (24 mM).

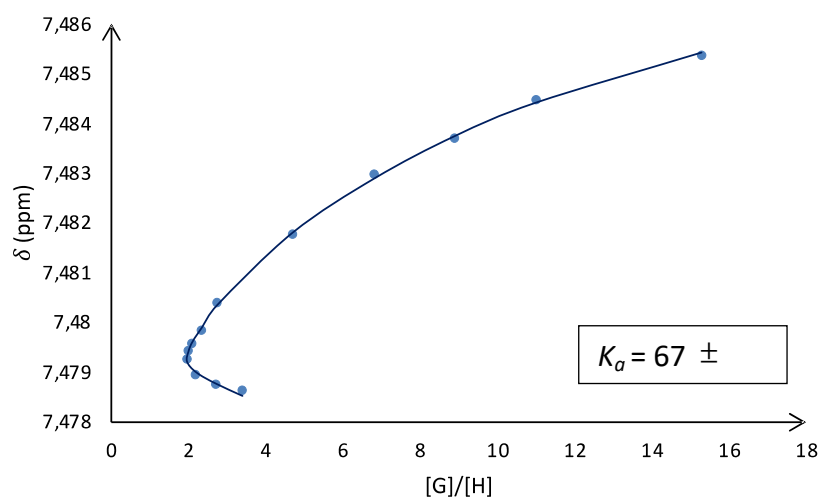

**Figure S8.** Titration curve of host **3** (1 mM,  $\text{CD}_3\text{CN}$ ) with tetramethylammonium acetate (24 mM,  $\text{CD}_3\text{CN}$ ). The chemical induced shifts  $\delta$  of host's proton at 7.48 ppm was measured and plotted as a function of the ratio  $[\text{G}]/[\text{H}]$  (dots). Curve was fitted with the bindfit program (line) assuming a 1:1 stoichiometry.

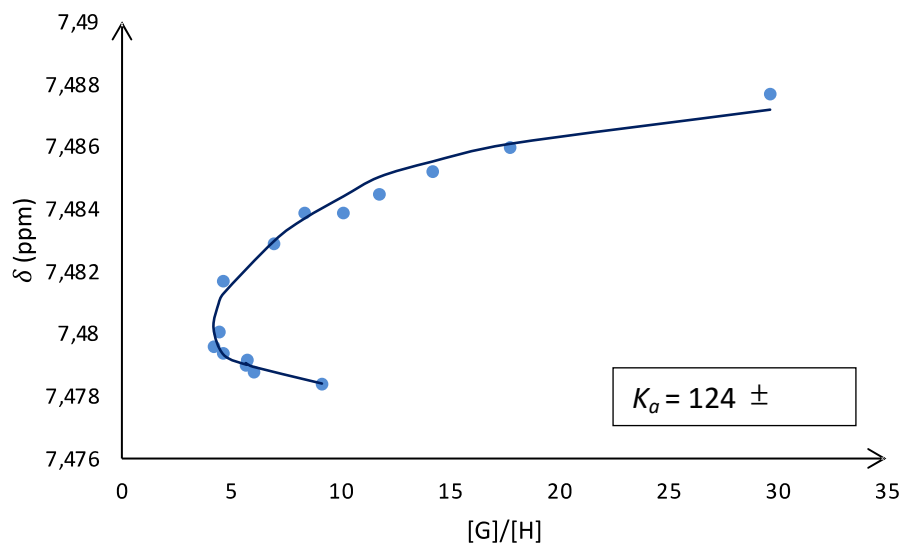

**Figure S9.** Titration curve of host **3** (0,79 mM,  $CD_3CN$ ) with tetramethylammonium chloride (19 mM,  $CD_3CN$ ). The chemical induced shifts  $\delta$  of host's proton at 7.47 ppm was measured and plotted as a function of the ratio  $[G]/[H]$  (dots). Curve was fitted with the bindfit program (line) assuming a 1:1 stoichiometry.

## 7. NMR spectra of compound **3**

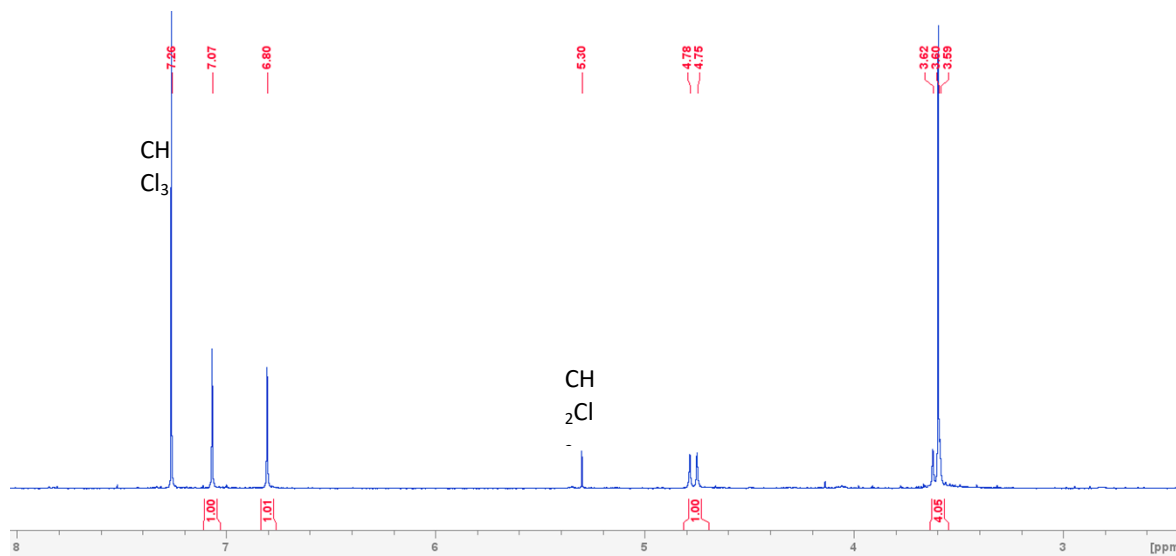

**Figure S10.**  $^1H$  NMR spectrum (400 MHz,  $CDCl_3$ , 298K) of cryptophane **3**.

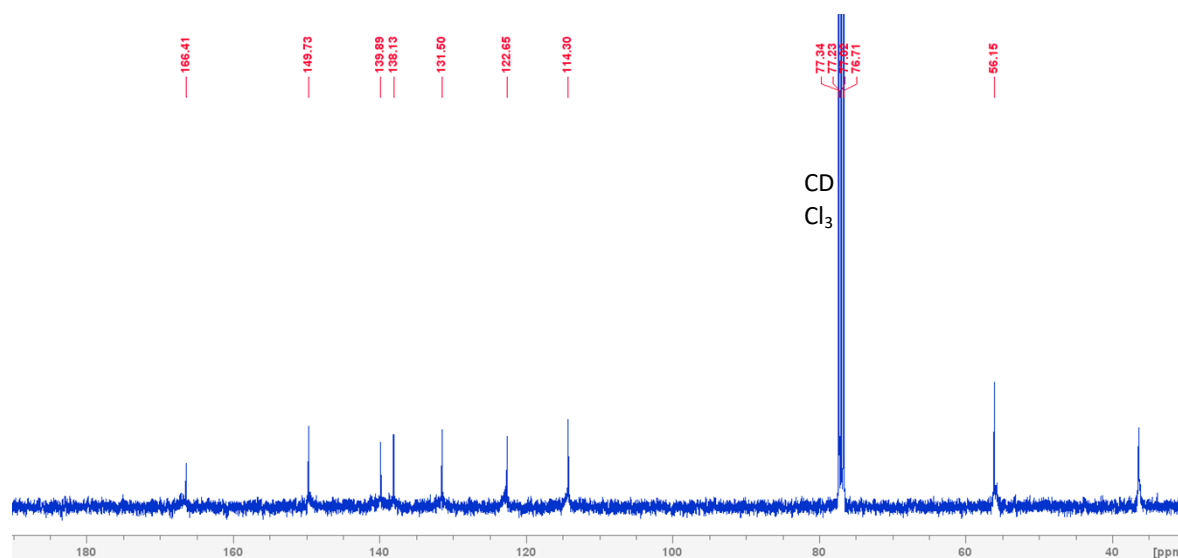

Figure S11. <sup>13</sup>C NMR spectrum (400 MHz, CDCl<sub>3</sub>, 298K) of cryptophane 3.

## 8. References

- <sup>1</sup> O. Della-Negra, Y. Cirillo, T. Brotin, J.-P. Dutasta, P.-L. Saaidi, B. Chatelet, A. Martinez, *Chem. Commun.*, 2022, **58**, 3330.
- <sup>2</sup> <https://supramolecular.org>.
- <sup>3</sup> D. Brynn Hibbert, P. Thordarson, *Chem. Commun.*, 2016, **52**, 12792.
- <sup>4</sup> K. Hirose, *Journal of Inclusion Phenomena and Macrocyclic Chemistry*, 2001, **39**, 193.
- <sup>5</sup> O. V. Dolomanov, L. J. Bourhis, R. J. Gildea, J. A. K. Howard, H. Puschmann, *J. Appl. Crystallogr.*, 2009, **42**, 339.
- <sup>6</sup> G. M. Sheldrick, *Acta Crystallogr A Found Adv*, 2015, **71**, 3.
- <sup>7</sup> TURBOMOLE V7.5 2020, a development of University of Karlsruhe and Forschungszentrum Karlsruhe GmbH, 1989-2007, TURBOMOLE GmbH, since 2007; available from <https://www.turbomole.org>.
- <sup>8</sup> a) P. A. M. Dirac, R. H. Fowler, *Proc. Royal Soc.*, 1929, **123**, 714; b) J. C. Slater, *Phys. Rev.*, 1951, **81**, 385; c) J. P. Perdew, Y. Wang, *Phys. Rev. B*, 1992, **45**, 13244; d) J. P. Perdew, K. Burke, M. Ernzerhof, *Phys. Rev. Lett.*, 1996, **77**, 3865; e) J. P. Perdew, M. Ernzerhof, K. Burke, *J. Chem. Phys.*, 1996, **105**, 9982.
- <sup>9</sup> S. Grimme, J. Antony, S. Ehrlich, H. Krieg, *J. Chem. Phys.*, 2010, **132**, 154104.
- <sup>10</sup> F. Weigend, R. Ahlrichs, *Phys. Chem. Chem. Phys.*, 2005, **7**, 3297.
- <sup>11</sup> T. Yanai, D. P. Tew, N. C. Handy, *Chem. Phys. Lett.*, 2004, **396**, 51.
- <sup>12</sup> F. Weigend, *Phys. Chem. Chem. Phys.*, 2006, **8**, 1057.
- <sup>13</sup> E. R. Johnson, S. Keinan, P. Mori-Sánchez, J. Contreras-García, A. J. Cohen, W. Yang, *J. Am. Chem. Soc.*, 2010, **132**, 6498.
